# Supplementary material for: Metabolomic Analysis of Phytochemical Compounds from Agricultural Residues of Eggplant (Solanum melongena L.)
Source: MDPI journal article supplement (doi:10.3390/molecules27207013), 2022-10-18
Supplement: s1 [file s1]

**Table S1. List of putatively annotated metabolites (SIRIUS 4.9.12) in *Solanum melongena* L. by location.**

| Name                                                                                                                                                                                                                                                                                                                                                                                                                            | Superclass                      | Class                            | Subclass                  | Molecular Formula | Adduct                                  | Theoretical mass | Experimental mass | Mass accuracy (ppm) | Retention time (min) | Spectral Match / Confidence Score | Location |
|---------------------------------------------------------------------------------------------------------------------------------------------------------------------------------------------------------------------------------------------------------------------------------------------------------------------------------------------------------------------------------------------------------------------------------|---------------------------------|----------------------------------|---------------------------|-------------------|-----------------------------------------|------------------|-------------------|---------------------|----------------------|-----------------------------------|----------|
| 2-((6-((4,5-dihydroxy-6-(hydroxymethyl)-2-((5,6a',9'-trimethyl-5-(((3,4,5-trihydroxy-6-(hydroxymethyl)tetrahydro-2H-pyran-2-yl)oxy)methyl)-1',3',4,4',5,5',6',6a',6b',7',8',8a',8b',9',11a',12',12a',12b'-octadecahydro-3H-spiro[furan-2,10'-naphtho[2',1':4,5]indeno[2,1-b]furan]-4'-yl)oxy)tetrahydro-2H-pyran-3-yl)oxy)-4,5-dihydroxy-2-(hydroxymethyl)tetrahydro-2H-pyran-3-yl)oxy)-6-methyltetrahydro-2H-pyran-3,4,5-triol | Lipids and lipid-like molecules | Steroids and steroid derivatives | Steroidal glycosides      | C51H82O23         | [M + H] <sup>+</sup>                    | 1063.5319        | 1063.5334         | 1.3861              | 22.5587              | Spectral Match                    | Root     |
| Austinoneol                                                                                                                                                                                                                                                                                                                                                                                                                     | Organoheterocyclic compounds    | Pyrans                           | Pyranones and derivatives | C24H30O6          | [M + H] <sup>+</sup>                    | 415.2114         | 415.212           | 1.2674              | 28.4702              | Spectral Match                    | Root     |
| Khasianine                                                                                                                                                                                                                                                                                                                                                                                                                      | Lipids and lipid-like molecules | Steroids and steroid derivatives | Steroidal glycosides      | C39H63NO11        | [M + H] <sup>+</sup>                    | 722.4473         | 722.4502          | 4.0382              | 14.5986              | Spectral Match                    | Root     |
| 2-Naphthaleneacetic acid, decahydro-8-hydroxy-4a,8-dimethyl- $\alpha$ -methylene-                                                                                                                                                                                                                                                                                                                                               | Lipids and lipid-like molecules | Prenol lipids                    | Sesquiterpenoids          | C15H24O3          | [M - H <sub>2</sub> O + H] <sup>+</sup> | 235.1698         | 235.1699          | 0.2299              | 18.243               | Spectral Match                    | Root     |
| Spirost-5-en-3-ol, (3 $\beta$ ,25R)-                                                                                                                                                                                                                                                                                                                                                                                            | Lipids and lipid-like molecules | Prenol lipids                    | Triterpenoids             | C27H42O3          | [M + H] <sup>+</sup>                    | 415.3206         | 415.3172          | -8.2164             | 14.4936              | Spectral Match                    | Root     |
| Solamargine                                                                                                                                                                                                                                                                                                                                                                                                                     | Lipids and lipid-like molecules | Steroids and steroid derivatives | Steroidal glycosides      | C45H73NO15        | [M + H] <sup>+</sup>                    | 868.5052         | 868.506           | 0.8526              | 14.6289              | Spectral Match                    | Root     |
| Solasonine                                                                                                                                                                                                                                                                                                                                                                                                                      | Lipids and lipid-like molecules | Steroids and steroid derivatives | Steroidal glycosides      | C45H73NO16        | [M + H] <sup>+</sup>                    | 884.5001         | 884.5034          | 3.6901              | 14.5241              | Spectral Match                    | Root     |

|                                                                                                                                                                                                                             |                                           |                                  |                                       |            |                                         |           |           |         |         |                |                 |
|-----------------------------------------------------------------------------------------------------------------------------------------------------------------------------------------------------------------------------|-------------------------------------------|----------------------------------|---------------------------------------|------------|-----------------------------------------|-----------|-----------|---------|---------|----------------|-----------------|
| [(2R,3R,4S,5S,6R)-4,5-dihydroxy-2-[5-hydroxy-2-(4-hydroxyphenyl)-4-oxo-7-[(2S,3R,4S,5S,6R)-3,4,5-trihydroxy-6-(hydroxymethyl)oxan-2-yl]oxychromen-3-yl]oxy-6-(hydroxymethyl)oxan-3-yl] (E)-3-(4-hydroxyphenyl)prop-2-enoate | Phenylpropanoids and polyketides          | Flavonoids                       | Flavonoid glycosides                  | C36H36O18  | [M + H] <sup>+</sup>                    | 757.1974  | 757.2035  | 8.0864  | 15.9276 | Spectral Match | Leaf            |
| (E)-N-[2-hydroxy-2-(4-hydroxyphenyl)ethyl]-3-(4-hydroxy-3-methoxyphenyl)prop-2-enamide                                                                                                                                      | Phenylpropanoids and polyketides          | Cinnamic acids and derivatives   | Hydroxycinnamic acids and derivatives | C18H19NO5  | [M + H] <sup>+</sup>                    | 330.1335  | 330.1342  | 2.0058  | 14.1932 | Spectral Match | Leaf Root       |
| 4-[(3R,3aR,6S,6aR)-6-(4-hydroxy-3,5-dimethoxyphenyl)-1,3,3a,4,6,6a-hexahydrofuro[3,4-c]furan-3-yl]-2,6-dimethoxyphenol [IIN-based: Match]                                                                                   | Lignans, neolignans and related compounds | Furanoid lignans                 | Unassigned                            | C22H26O8   | [M + H] <sup>+</sup>                    | 419.17    | 419.168   | -4.6468 | 11.7681 | Spectral Match | Leaf Root       |
| Solasodine                                                                                                                                                                                                                  | Lipids and lipid-like molecules           | Steroids and steroid derivatives | Steroidal alkaloids                   | C27H43NO2  | [M + H] <sup>+</sup>                    | 414.3366  | 414.3331  | -8.2936 | 14.4397 | Spectral Match | Fruit Root      |
| (3β,22R,25R)-26-(β-D-Glucopyranosyloxy)-22-hydroxyfurost-5-en-3-yl 6-deoxy-α-L-mannopyranosyl-(1→2)-[β-D-glucopyranosyl-(1→4)]-β-D-glucopyranoside                                                                          | Lipids and lipid-like molecules           | Steroids and steroid derivatives | Steroidal glycosides                  | C51H84O23  | [M - H <sub>2</sub> O + H] <sup>+</sup> | 1047.5376 | 1047.5395 | 1.8052  | 17.9155 | Spectral Match | Fruit Root      |
| Pheophorbide A                                                                                                                                                                                                              | Organoheterocyclic compounds              | Tetrapyrroles and derivatives    | Chlorins                              | C35H36N4O5 | [M + H] <sup>+</sup>                    | 593.2758  | 593.2768  | 1.7446  | 29.0621 | Spectral Match | Fruit Leaf Root |
| Glycerol 1-stearate                                                                                                                                                                                                         | Lipids and lipid-like molecules           | Glycerolipids                    | Monoradylglycerols                    | C21H42O4   | [M + H] <sup>+</sup>                    | 359.3155  | 359.3158  | 0.8902  | 29.6387 | Spectral Match | Fruit Leaf Root |
| Rutin                                                                                                                                                                                                                       | Phenylpropanoids and polyketides          | Flavonoids                       | Flavonoid glycosides                  | C27H30O16  | [M + H] <sup>+</sup>                    | 611.1606  | 611.1612  | 1.0194  | 12.3155 | Spectral Match | Stem Leaf       |

|                                                                                                                                                                                                   |                                           |                                |                                       |             |                             |          |          |         |         |                |                |
|---------------------------------------------------------------------------------------------------------------------------------------------------------------------------------------------------|-------------------------------------------|--------------------------------|---------------------------------------|-------------|-----------------------------|----------|----------|---------|---------|----------------|----------------|
| Linoleoyl ethanolamide                                                                                                                                                                            | Organic nitrogen compounds                | Organonitrogen compounds       | Amines                                | C20H37NO2   | [M + H] <sup>+</sup>        | 324.2896 | 324.2898 | 0.6176  | 27.717  | Spectral Match | Stem Leaf      |
| Bisabolene-1,4-endoperoxide                                                                                                                                                                       | Organoheterocyclic compounds              | Dioxanes                       | 1,2-dioxanes                          | C15H24O2    | [M - 2H2O + H] <sup>+</sup> | 201.1643 | 201.1633 | -5.247  | 17.1266 | Spectral Match | Stem Leaf Root |
| Kaempferol-7-neohesperidoside                                                                                                                                                                     | Phenylpropanoids and polyketides          | Flavonoids                     | Flavonoid glycosides                  | C27H30O15   | [M + H] <sup>+</sup>        | 595.1657 | 595.1681 | 4.0129  | 12.8166 | Spectral Match | Stem Leaf Root |
| Jasmonic acid                                                                                                                                                                                     | Lipids and lipid-like molecules           | Fatty Acyls                    | Lineolic acids and derivatives        | C12H18O3    | [M + H] <sup>+</sup>        | 211.1328 | 211.1314 | -6.5013 | 17.4551 | Spectral Match | Stem Leaf Root |
| (2R,3R,4S,5S,6R)-2-[[6-hydroxy-4-(4-hydroxy-3,5-dimethoxyphenyl)-3-(hydroxymethyl)-5,7-dimethoxy-1,2,3,4-tetrahydronaphthalen-2-yl]methoxy]-6-(hydroxymethyl)oxane-3,4,5-triol [IIN-based: Match] | Lignans, neolignans and related compounds | Lignan glycosides              | Unassigned                            | C28H38O13   | [M + H3N + H] <sup>+</sup>  | 600.2656 | 600.2655 | -0.2019 | 13.1444 | Spectral Match | Stem Leaf Root |
| (1R,2S)-7-hydroxy-1-(4-hydroxy-3,5-dimethoxyphenyl)-2-N,3-N-bis[2-(4-hydroxyphenyl)ethyl]-6,8-dimethoxy-1,2-dihydronaphthalene-2,3-dicarboxamide [IIN-based: Match]                               | Lignans, neolignans and related compounds | Aryltetralin lignans           | Unassigned                            | C38H40N2O10 | [M + H] <sup>+</sup>        | 685.2755 | 685.2742 | -1.9427 | 18.2474 | Spectral Match | Stem Leaf Root |
| Paprazine                                                                                                                                                                                         | Phenylpropanoids and polyketides          | Cinnamic acids and derivatives | Hydroxycinnamic acids and derivatives | C17H17NO3   | [M + H] <sup>+</sup>        | 284.128  | 284.1286 | 1.8562  | 15.1785 | Spectral Match | Stem Leaf Root |
| Astragaline                                                                                                                                                                                       | Phenylpropanoids and polyketides          | Flavonoids                     | Flavonoid glycosides                  | C21H20O11   | [M + H] <sup>+</sup>        | 449.1078 | 449.1095 | 3.9363  | 13.7257 | Spectral Match | Stem Leaf Root |
| 17(18)-EpETE                                                                                                                                                                                      | Lipids and lipid-like molecules           | Fatty Acyls                    | Fatty acids and conjugates            | C20H30O3    | [M - H2O + H] <sup>+</sup>  | 301.2168 | 301.2154 | -4.5294 | 26.3018 | Spectral Match | Stem Leaf Root |
| Isorhamnetin 3-O-glucoside                                                                                                                                                                        | Phenylpropanoids and polyketides          | Flavonoids                     | Flavonoid glycosides                  | C22H22O12   | [M + H] <sup>+</sup>        | 479.1183 | 479.1201 | 3.7117  | 14.1702 | Spectral Match | Stem Leaf Root |

|                                                                                                                                                                                                                          |                                 |                                  |                                      |            |                                         |           |           |         |         |                |                      |
|--------------------------------------------------------------------------------------------------------------------------------------------------------------------------------------------------------------------------|---------------------------------|----------------------------------|--------------------------------------|------------|-----------------------------------------|-----------|-----------|---------|---------|----------------|----------------------|
| 1,3-Dicaffeoyl-epi-quinic acid                                                                                                                                                                                           | Organic oxygen compounds        | Organooxygen compounds           | Alcohols and polyols                 | C25H24O12  | [M + H] <sup>+</sup>                    | 517.134   | 517.1354  | 2.7805  | 13.8533 | Spectral Match | Stem Fruit Leaf      |
| 9,12,13,TriHODE                                                                                                                                                                                                          | Lipids and lipid-like molecules | Fatty Acyls                      | Lineolic acids and derivatives       | C18H32O5   | [M - H <sub>2</sub> O + H] <sup>+</sup> | 311.2222  | 311.2223  | 0.1477  | 25.3442 | Spectral Match | Stem Fruit Leaf Root |
| LPC 18:3                                                                                                                                                                                                                 | Lipids and lipid-like molecules | Glycerophospholipids             | Glycerophosphocholines               | C26H48NO7P | [M + H] <sup>+</sup>                    | 518.324   | 518.3236  | -0.8726 | 25.7125 | Spectral Match | Stem Fruit Leaf Root |
| LPC 18:2                                                                                                                                                                                                                 | Lipids and lipid-like molecules | Glycerophospholipids             | Glycerophosphocholines               | C26H50NO7P | [M + H] <sup>+</sup>                    | 520.3397  | 520.3375  | -4.252  | 26.1229 | Spectral Match | Stem Fruit Leaf Root |
| (E)-3-(4-hydroxy-3-methoxyphenyl)-N-[2-(4-hydroxyphenyl)ethyl]prop-2-enamide [IIN-based: Match]                                                                                                                          | Benzenoids                      | Phenols                          | Methoxyphenols                       | C18H19NO4  | [M + H] <sup>+</sup>                    | 314.1386  | 314.139   | 1.3033  | 15.8207 | Spectral Match | Stem Fruit Leaf Root |
| beta-D-Glucopyranoside, spirosol-5-en-3-yl O-6-deoxy-alpha-L-mannopyranosyl-(1->2)-O-[6-deoxy-alpha-L-mannopyranosyl-(1->4)]-                                                                                            | Lipids and lipid-like molecules | Steroids and steroid derivatives | Steroidal glycosides                 | C45H73NO15 | [M + H] <sup>+</sup>                    | 868.5052  | 868.5056  | 0.4412  | 17.783  | Spectral Match | Stem Fruit Leaf Root |
| beta-D-Glucopyranoside, (3beta,22beta,25R)-26-(beta-D-glucopyranosyloxy)-22-hydroxyfurost-5-en-3-yl O-6-deoxy-alpha-L-mannopyranosyl-(1->2)-O-[6-deoxy-alpha-L-mannopyranosyl-(1->4)]-                                   | Lipids and lipid-like molecules | Steroids and steroid derivatives | Steroidal glycosides                 | C51H84O22  | [M - H <sub>2</sub> O + H] <sup>+</sup> | 1031.5427 | 1031.5419 | -0.7419 | 17.9545 | Spectral Match | Stem Fruit Leaf Root |
| Carmabin B                                                                                                                                                                                                               | Organic acids and derivatives   | Carboxylic acids and derivatives | Amino acids, peptides, and analogues | C40H59N5O7 | [M + H] <sup>+</sup>                    | 722.4486  | 722.4474  | -1.6987 | 15.1996 | 1              | Fruit Leaf Root      |
| 2-amino-4-((7-carboxy-11-(4,5-dimethyl-4,4a,5,6,7,8,8a,9-octahydro-1H-benzo[f]indol-2-yl)-3a,6-dihydroxy-8-(4-(6-hydroxy-4-pentylcyclohex-2-en-1-yl)butyl)dodecahydro-1H-cyclopenta[10]annulen-2-yl)methyl)pyridin-1-ium | Organic acids and derivatives   | Carboxylic acids and derivatives | Amino acids, peptides, and analogues | C49H75N3O5 | [M + Na] <sup>+</sup>                   | 808.5604  | 808.5559  | -5.5809 | 29.2657 | 1              | Leaf                 |

|                                                                                                                                                                                                                                                        |                                 |                                  |                                           |             |                            |          |          |         |         |      |                 |
|--------------------------------------------------------------------------------------------------------------------------------------------------------------------------------------------------------------------------------------------------------|---------------------------------|----------------------------------|-------------------------------------------|-------------|----------------------------|----------|----------|---------|---------|------|-----------------|
| phenacetyl KKR-acid                                                                                                                                                                                                                                    | Organic acids and derivatives   | Carboxylic acids and derivatives | Amino acids, peptides, and analogues      | C26H44N8O5  | [M + K] <sup>+</sup>       | 587.3072 | 587.3091 | 3.2063  | 18.1329 | 1    | Leaf Root       |
| [(1R,4S,5'S,6R,6'S,8R,10Z,12R,13S,14E,16E,20R,21R,24S)-6'-[(E)-but-2-en-2-yl]-24-hydroxy-21-methoxy-5',11,13,22-tetramethyl-2-oxospiro[3,7,19-trioxatetracyclo[15.6.1.14,8.020,24]pentacosa-10,14,16,22-tetraene-6,2'-oxane]-12-yl] 2-methylpropanoate | Organic acids and derivatives   | Carboxylic acids and derivatives | Amino acids, peptides, and analogues      | C39H56O9    | [M + H3N + H] <sup>+</sup> | 686.4268 | 686.4266 | -0.2419 | 15.1693 | 0.99 | Fruit           |
| Fcoxanthin acetate                                                                                                                                                                                                                                     | Lipids and lipid-like molecules | Glycerolipids                    | Triradylglycerols                         | C44H60O7    | [M + Na] <sup>+</sup>      | 723.4237 | 723.4298 | 8.4874  | 26.7678 | 0.99 | Leaf            |
| 1-[N-(24-{N-[2-(acetyloxy)-3-acetamidopropyl]acetamido}tracosa-3,6,18,21-tetraen-1-yl)acetamido]-3-acetamidopropan-2-yl acetate                                                                                                                        | Lipids and lipid-like molecules | Glycerolipids                    | Triradylglycerols                         | C42H70N4O8  | [M + Na] <sup>+</sup>      | 781.5091 | 781.5013 | -9.9924 | 33.8738 | 0.99 | Leaf            |
| Corymbivillosol Acetate                                                                                                                                                                                                                                | Lipids and lipid-like molecules | Glycerolipids                    | Triradylglycerols                         | C45H70O7    | [M + Na] <sup>+</sup>      | 745.5019 | 745.501  | -1.2649 | 34.0031 | 0.99 | Stem Fruit Root |
| Val-Ala-His-Ser-Gly-Ala                                                                                                                                                                                                                                | Organic acids and derivatives   | Carboxylic acids and derivatives | Amino acids, peptides, and analogues      | C22H37N9O7  | [M + H] <sup>+</sup>       | 540.2888 | 540.2904 | 2.9915  | 12.3812 | 0.99 | Root            |
| 18:3,16:0 Sulfoglycolipid                                                                                                                                                                                                                              | Lipids and lipid-like molecules | Glycerolipids                    | Glycosylglycerols                         | C43H76O12S  | [M + Na] <sup>+</sup>      | 839.4955 | 839.5003 | 5.7212  | 28.2057 | 0.98 | Leaf            |
| [(2S)-2-hydroxy-3-[(2R,3R,4S,5R,6R)-3,4,5-trihydroxy-6-(hydroxymethyl)oxan-2-yl]oxypropyl] (Z)-hexadec-9-enoate                                                                                                                                        | Organic oxygen compounds        | Organooxygen compounds           | Carbohydrates and carbohydrate conjugates | C25H46O9    | [M + Na] <sup>+</sup>      | 513.304  | 513.3038 | -0.3237 | 24.3347 | 0.98 | Stem Leaf Root  |
| His-Arg-Lys(Me)-Val-Leu-Arg                                                                                                                                                                                                                            | Organic acids and derivatives   | Carboxylic acids and derivatives | Amino acids, peptides, and analogues      | C36H67N15O7 | [M + H] <sup>+</sup>       | 822.542  | 822.5339 | -9.8881 | 28.9573 | 0.98 | Leaf            |

|                                                                                                                                                                                                                                                           |                                 |                                     |                                      |             |                       |          |          |         |         |      |                |
|-----------------------------------------------------------------------------------------------------------------------------------------------------------------------------------------------------------------------------------------------------------|---------------------------------|-------------------------------------|--------------------------------------|-------------|-----------------------|----------|----------|---------|---------|------|----------------|
| OxPC 34:1+10(1Cyc)                                                                                                                                                                                                                                        | Lipids and lipid-like molecules | Glycerophospholipids                | Glycerophosphocholines               | C42H80NO9P  | [M + H] <sup>+</sup>  | 774.5643 | 774.5673 | 3.9271  | 28.2585 | 0.98 | Root           |
| [4-[(4R)-4-(2-pyrrolidin-1-ylethyl)-3,4-dihydro-2H-pyridine-1-carbonyl]-3-[4-(pyrrolidin-1-ylmethoxy)anilino]phenyl]-[4-(2-pyrrolidin-1-ylethyl)piperidin-1-yl]methanone                                                                                  | Benzenoids                      | Benzene and substituted derivatives | Benzoyl derivatives                  | C41H58N6O3  | [M + H] <sup>+</sup>  | 683.4642 | 683.4681 | 5.6646  | 20.6357 | 0.98 | Stem Leaf Root |
| Ac-Ala-Asp-Val-Ala-Asp-al                                                                                                                                                                                                                                 | Organic acids and derivatives   | Carboxylic acids and derivatives    | Amino acids, peptides, and analogues | C21H33N5O10 | [M + Na] <sup>+</sup> | 538.2125 | 538.2142 | 3.225   | 16.4626 | 0.98 | Stem Leaf Root |
| (2S,4S,5R)-N-[3-[3-[(2,3-dihydroxybenzoyl)amino]propyl-[(2S,4S,5R)-2-(2,3-dihydroxyphenyl)-5-methyl-1,3-oxazolidine-4-carbonyl]amino]propyl]-2-(2,3-dihydroxyphenyl)-5-methyl-1,3-oxazolidine-4-carboxamide                                               | Organic acids and derivatives   | Carboxylic acids and derivatives    | Amino acids, peptides, and analogues | C35H43N5O11 | [M + K] <sup>+</sup>  | 748.2596 | 748.2652 | 7.4145  | 15.7078 | 0.98 | Stem Leaf Root |
| 4-{7-[(5-{[3,4-dihydroxy-4-(hydroxymethyl)oxolan-2-yl]oxy}-3,4-dihydroxy-6-methyloxan-2-yl)oxy]-2,3a,10-trihydroxy-9a,11a-dimethylhexadecahydro-1H-cyclopenta[a]phenanthren-1-yl}-2,5-dihydrofuran-2-one                                                  | Lipids and lipid-like molecules | Steroids and steroid derivatives    | Steroidal glycosides                 | C34H52O14   | [M + Na] <sup>+</sup> | 707.3255 | 707.3268 | 1.8955  | 10.7197 | 0.98 | Leaf           |
| 2-[4'-(6-{3-cyclohexyl-6-methyl-4-azabicyclo[9.3.1]pentadecan-1(15),6,11,13-tetraen-9-yl}-1-hydroxyhepta-2,4,6-trien-2-yl)-3,5'-dihydroxy-8-(2-hydroxyethyl)-3-[2-(methylamino)ethyl]spiro[bicyclo[3.3.1]nonane-2,1'-cyclopentan]-6-en-9-ylidene]propanal | Lipids and lipid-like molecules | Sphingolipids                       | Ceramides                            | C49H70N2O5  | [M + Na] <sup>+</sup> | 789.5182 | 789.5147 | -4.5469 | 29.4693 | 0.98 | Leaf           |

|                                                                                                                                                                                                           |                                 |                                  |                                           |              |                       |          |          |         |         |      |                      |
|-----------------------------------------------------------------------------------------------------------------------------------------------------------------------------------------------------------|---------------------------------|----------------------------------|-------------------------------------------|--------------|-----------------------|----------|----------|---------|---------|------|----------------------|
| 4-Amino-N-((1r,8r,9r,13r)-16-(4-Amino-2-Methylpyrimidin-5-Yl)-1-Benzyl-8-(Cyclohexylmethyl)-9-Hydroxy-13-[(1s)-1-Methylpropyl]-2,6,11,14-Tetraoxo-3,7,12,15-Tetraazahexadec-1-Yl)piperidine-1-Carboxamide | Lipids and lipid-like molecules | Fatty Acyls                      | Fatty amides                              | C41H64N10O6  | [M + Na] <sup>+</sup> | 815.4908 | 815.4931 | 2.7971  | 27.9432 | 0.98 | Leaf                 |
| [2-Hydroxy-3-[3,4,5-trihydroxy-6-[[3,4,5-trihydroxy-6-(hydroxymethyl)oxan-2-yl]oxymethyl]oxan-2-yl]oxypropyl] hexadecanoate                                                                               | Lipids and lipid-like molecules | Glycerolipids                    | Glycosylglycerols                         | C31H58O14    | [M + H] <sup>+</sup>  | 655.3899 | 655.3948 | 7.5661  | 26.3375 | 0.97 | Leaf Root            |
| piplartine dimer A                                                                                                                                                                                        | Organic acids and derivatives   | Carboxylic acids and derivatives | Amino acids, peptides, and analogues      | C34H38N2O10  | [M + Na] <sup>+</sup> | 657.2424 | 657.2443 | 2.8889  | 16.8602 | 0.97 | Stem Fruit Leaf Root |
| [(2S)-2-nonanoyloxy-3-[(2R,3S,4S,5R,6S)-3,4,5-trihydroxy-6-[[[(2S,3R,4S,5R,6S)-3,4,5-trihydroxy-6-(hydroxymethyl)oxan-2-yl]oxymethyl]oxan-2-yl]oxypropyl] tetradecanoate                                  | Organic oxygen compounds        | Organooxygen compounds           | Carbohydrates and carbohydrate conjugates | C38H70O15    | [M + Na] <sup>+</sup> | 789.4612 | 789.4652 | 5.0709  | 34.0133 | 0.97 | Root                 |
| 2'',3'',5''-Tri-O-acetylnebularine                                                                                                                                                                        | Organic oxygen compounds        | Organooxygen compounds           | Carbohydrates and carbohydrate conjugates | C16H18N4O7   | [M + H] <sup>+</sup>  | 379.1247 | 379.1215 | -8.4965 | 14.1774 | 0.97 | Fruit Root           |
| N-[4-[2-[2,4-bis(2-methylbutan-2-yl)phenoxy]butanoylamino]-2-hydroxyphenyl]-2,2,3,3,4,4,4-heptafluorobutanamide                                                                                           | Organic acids and derivatives   | Carboxylic acids and derivatives | Amino acids, peptides, and analogues      | C30H37F7N2O4 | [M + H] <sup>+</sup>  | 623.2714 | 623.2714 | 0.1513  | 12.775  | 0.97 | Leaf                 |
| Diethyl ({4-[(2s,3r)-2-(((3r,3as,6ar)-Hexahydrofuro[2,3-B]furan-3-Yloxy)carbonyl)amino)-3-Hydroxy-4-{isobutyl[(4-Methoxyphenyl)sulfonyl]amino}butyl}phenoxy)methyl)phosphonate                            | Organic acids and derivatives   | Carboxylic acids and derivatives | Amino acids, peptides, and analogues      | C33H49N2O12P | [M + H] <sup>+</sup>  | 729.2816 | 729.2761 | -7.5122 | 15.3511 | 0.97 | Stem Leaf Root       |

|                                                                                                                                                                                                                         |                                         |                                  |                                           |              |                                         |          |          |         |         |      |                      |
|-------------------------------------------------------------------------------------------------------------------------------------------------------------------------------------------------------------------------|-----------------------------------------|----------------------------------|-------------------------------------------|--------------|-----------------------------------------|----------|----------|---------|---------|------|----------------------|
| Glu-Leu-Val-Ile-Ser                                                                                                                                                                                                     | Organic acids and derivatives           | Peptidomimetics                  | Depsipeptides                             | C25H45N5O9   | [M + H <sup>3</sup> N + H] <sup>+</sup> | 577.3561 | 577.3617 | 9.697   | 19.0387 | 0.97 | Fruit Leaf Root      |
| (2S)-2-[[[(2S)-2-[[[(2S)-2-[[[(2S)-6-amino-2-[[[(2S)-1-[[[(2S)-3-hydroxy-2-(methylamino)propanoyl]pyrrolidine-2-carbonyl]amino]hexanoyl]amino]-5-(diaminomethylideneamino)pentanoyl]amino]butanoyl]amino]propanoic acid | Organic acids and derivatives           | Carboxylic acids and derivatives | Amino acids, peptides, and analogues      | C28H52N10O8  | [M + K] <sup>+</sup>                    | 695.3607 | 695.3633 | 3.7839  | 12.5817 | 0.97 | Stem Fruit Leaf Root |
| [6-[[[6-[3,4-dihydroxy-2,5-bis(hydroxymethyl)oxolan-2-yl]oxy-3,4,5-trihydroxyoxan-2-yl]methoxy]-3,4,5-trihydroxyoxan-2-yl]methyl (E)-2-methylbut-2-enoate                                                               | Organic oxygen compounds                | Organooxygen compounds           | Carbohydrates and carbohydrate conjugates | C23H38O17    | [M + H] <sup>+</sup>                    | 587.2181 | 587.2192 | 1.7933  | 22.2828 | 0.96 | Root                 |
| 1-[[6-(aminomethyl)-3,4,5-trihydroxyoxan-2-yl]oxy]-3-(octadeca-9,12,15-trienyloxy)propan-2-yl 12-methyloctadeca-9,12,15-trienoate                                                                                       | Phenylpropenoids and polyketides        | Macrolides and analogues         | Unassigned                                | C46H77NO9    | [M + Na] <sup>+</sup>                   | 810.5496 | 810.5541 | 5.5569  | 27.353  | 0.96 | Stem Fruit Leaf Root |
| methyl 5-{2,5,5,8a-tetramethyl-6-[(2-methylpropanoyl)oxy]-7-[(3,4,5-trihydroxy-6-methyloxan-2-yl)oxy]-1,4,4a,5,6,7,8,8a-octahydronaphthalen-1-yl}-3-methylpentanoate                                                    | Organic oxygen compounds                | Organooxygen compounds           | Carbohydrates and carbohydrate conjugates | C31H52O9     | [M + Na] <sup>+</sup>                   | 591.3509 | 591.3541 | 5.4175  | 20.4548 | 0.96 | Fruit Root           |
| 2-[[2-[(3,4-dihydroxy-6,8-dioxabicyclo[3.2.1]octan-2-yl)oxy]-3,5-dihydroxy-6-(hydroxymethyl)oxan-4-yl]oxy]-6-methyloxane-3,4,5-triol                                                                                    | Nucleosides, nucleotides, and analogues | Purine nucleotides               | Purine ribonucleotides                    | C18H30O14    | [M + H] <sup>+</sup>                    | 471.1708 | 471.1699 | -1.8667 | 12.3812 | 0.96 | Root                 |
| 3-Aza-lipid X                                                                                                                                                                                                           | Organic acids and derivatives           | Carboxylic acids and derivatives | Amino acids, peptides,                    | C34H67N2O11P | [M + H] <sup>+</sup>                    | 711.4554 | 711.4607 | 7.359   | 33.8738 | 0.96 | Leaf                 |



|                                                                                                                                                                                                                                                                                        |                                  |                                  |                                      |                           |                       |          |          |         |         |      |                |
|----------------------------------------------------------------------------------------------------------------------------------------------------------------------------------------------------------------------------------------------------------------------------------------|----------------------------------|----------------------------------|--------------------------------------|---------------------------|-----------------------|----------|----------|---------|---------|------|----------------|
|                                                                                                                                                                                                                                                                                        |                                  |                                  | and analogues                        |                           |                       |          |          |         |         |      |                |
| 5-oxo-delta-bilirubin                                                                                                                                                                                                                                                                  | Organic acids and derivatives    | Carboxylic acids and derivatives | Amino acids, peptides, and analogues | C33H34N4O7                | [M + H] <sup>+</sup>  | 599.2499 | 599.2501 | 0.307   | 20.1278 | 0.96 | Stem Leaf      |
| Stearoyl Ara-C                                                                                                                                                                                                                                                                         | Organic acids and derivatives    | Carboxylic acids and derivatives | Amino acids, peptides, and analogues | C27H47N3O6                | [M + H] <sup>+</sup>  | 510.3537 | 510.3557 | 3.9113  | 27.0211 | 0.95 | Leaf Root      |
| Samabig                                                                                                                                                                                                                                                                                | Organic acids and derivatives    | Peptidomimetics                  | Depsipeptides                        | C38H68N4O12               | [M + K] <sup>+</sup>  | 811.4471 | 811.4455 | -1.9743 | 16.9561 | 0.95 | Stem Leaf Root |
| (3S,5S,6S,8S,9R,10S,13R,14S,15S,16R,17R)-10,13-dimethyl-17-[(E,2R,6S)-6-methyl-7-[(2S,3R,4S,5R)-3,4,5-trihydroxyoxan-2-yl]oxyhept-3-en-2-yl]-3-[(2S,3R,4S,5R)-3,4,5-trihydroxyoxan-2-yl]oxy-1,2,3,4,5,6,7,9,11,12,14,15,16,17-tetradecahydrocyclopenta[a]phenanthrene-6,8,15,16-tetrol | Lipids and lipid-like molecules  | Steroids and steroid derivatives | Hydroxysteroids                      | C37H62O14                 | [M + Na] <sup>+</sup> | 753.4037 | 753.4052 | 1.972   | 18.4243 | 0.95 | Fruit Root     |
| 2-[6-(2-aminoethyl)-2-benzyl-5-(7-cyclohexylhept-4-en-1-yl)-5-[(methylamino)methyl]cyclohex-3-en-1-yl]-3-hydroxybutanoic acid                                                                                                                                                          | Organic acids and derivatives    | Carboxylic acids and derivatives | Amino acids, peptides, and analogues | C34H54N2O3                | [M + K] <sup>+</sup>  | 577.3772 | 577.3719 | -9.0545 | 22.2468 | 0.95 | Fruit Root     |
| Archazolid A                                                                                                                                                                                                                                                                           | Organic acids and derivatives    | Peptidomimetics                  | Depsipeptides                        | C42H62N2O7S               | [M + H] <sup>+</sup>  | 739.435  | 739.4286 | -8.6418 | 22.2828 | 0.95 | Root           |
| Belofo KB                                                                                                                                                                                                                                                                              | Phenylpropanoids and polyketides | Cinnamic acids and derivatives   | Cinnamic acid esters                 | C34H30N10O8S <sub>2</sub> | [M + H] <sup>+</sup>  | 771.1761 | 771.1777 | 2.0051  | 12.848  | 0.94 | Leaf           |
| Cholic acid alpha-D-glucopyranosyl ester                                                                                                                                                                                                                                               | Organic acids and derivatives    | Carboxylic acids and derivatives | Amino acids, peptides, and analogues | C30H50O10                 | [M + H] <sup>+</sup>  | 571.3476 | 571.3474 | -0.339  | 16.8016 | 0.94 | Fruit Root     |

|                                                                                                   |                                         |                                     |                                      |               |                       |          |          |         |         |      |                         |
|---------------------------------------------------------------------------------------------------|-----------------------------------------|-------------------------------------|--------------------------------------|---------------|-----------------------|----------|----------|---------|---------|------|-------------------------|
| 17-(acetylamino)-3-(acetyloxy)androstan-16-yl 5-(acetyloxy)-4-methylpentanoate                    | Lipids and lipid-like molecules         | Prenol lipids                       | Terpene glycosides                   | C31H49NO7     | [M + Na] <sup>+</sup> | 570.3407 | 570.3399 | -1.3175 | 16.829  | 0.94 | Stem Fruit<br>Leaf Root |
| 4''' deoxy EM-A enolether                                                                         | Organic acids and derivatives           | Carboxylic acids and derivatives    | Amino acids, peptides, and analogues | C37H65NO11    | [M + Na] <sup>+</sup> | 722.4455 | 722.4448 | -0.9512 | 18.3326 | 0.93 | Fruit Leaf<br>Root      |
| Flavin adenine dinucleotide semiquinone radical                                                   | Nucleosides, nucleotides, and analogues | (5'→5')-dinucleotides               | Unassigned                           | C27H34N9O15P2 | [M + H] <sup>+</sup>  | 787.1722 | 787.1712 | -1.1907 | 12.2005 | 0.93 | Leaf                    |
| Ala-Arg-Thr-Lys-Gln-al                                                                            | Organic acids and derivatives           | Carboxylic acids and derivatives    | Amino acids, peptides, and analogues | C24H46N10O7   | [M + Na] <sup>+</sup> | 609.3449 | 609.3497 | 7.9189  | 17.7774 | 0.93 | Stem Leaf<br>Root       |
| 1,3-Bis(2,4-dinitrophenyl)-1,3-diethylurea                                                        | Benzenoids                              | Phenol ethers                       | Unassigned                           | C17H16N6O9    | [M + H] <sup>+</sup>  | 449.1051 | 449.1092 | 9.1417  | 13.1926 | 0.93 | Stem Leaf<br>Root       |
| 1-(9Z,12Z-octadecadienoyl)-glycero-3-phospho-(1''-myo-inositol)                                   | Lipids and lipid-like molecules         | Prenol lipids                       | Diterpenoids                         | C27H49O12P    | [M + H] <sup>+</sup>  | 597.3034 | 597.3062 | 4.6943  | 25.4498 | 0.92 | Stem Leaf<br>Root       |
| N-[(Benzyloxy)carbonyl]-L-Isoleucyl-N-[(1R)-1-(Carboxycarbonyl)-3,3-Difluoropropyl]-L-Leucinamide | Organic acids and derivatives           | Carboxylic acids and derivatives    | Amino acids, peptides, and analogues | C25H37F2N3O8  | [M + Na] <sup>+</sup> | 568.2446 | 568.2403 | -7.6075 | 13.7041 | 0.92 | Stem Fruit<br>Root      |
| Rodaplutin                                                                                        | Organic acids and derivatives           | Carboxylic acids and derivatives    | Amino acids, peptides, and analogues | C24H39N9O7    | [M + H] <sup>+</sup>  | 566.3044 | 566.3086 | 7.3483  | 21.5313 | 0.92 | Leaf                    |
| Antho-rwamide I                                                                                   | Organic acids and derivatives           | Carboxylic acids and derivatives    | Amino acids, peptides, and analogues | C31H46N10O7   | [M + Na] <sup>+</sup> | 693.3449 | 693.3471 | 3.1532  | 12.4244 | 0.92 | Stem Fruit<br>Leaf Root |
| Methionylpuromycin                                                                                | Organic acids and derivatives           | Carboxylic acids and derivatives    | Amino acids, peptides, and analogues | C27H38N8O6S   | [M + Na] <sup>+</sup> | 625.2533 | 625.254  | 1.1673  | 18.4366 | 0.91 | Stem Fruit<br>Leaf Root |
| (2S)-6-amino-2-[[[(2S)-4-amino-2-[[[(2S)-2,6-diaminohexanoyl]amino]butanoyl]amino]hexanoic Acid   | Benzenoids                              | Benzene and substituted derivatives | Unassigned                           | C16H34N6O4    | [M + H] <sup>+</sup>  | 375.2714 | 375.2698 | -4.074  | 28.3022 | 0.91 | Leaf                    |

|                                                                                                                                                                                                                                |                               |                                     |                                      |                           |                       |          |          |         |         |      |                      |
|--------------------------------------------------------------------------------------------------------------------------------------------------------------------------------------------------------------------------------|-------------------------------|-------------------------------------|--------------------------------------|---------------------------|-----------------------|----------|----------|---------|---------|------|----------------------|
| 6-methyl-3-phenylmethoxy-1-[3-(trifluoromethyl)phenyl]pyridazin-4-one                                                                                                                                                          | Benzenoids                    | Benzene and substituted derivatives | Diphenylethers                       | C19H15F3N2O2              | [M + H] <sup>+</sup>  | 361.1158 | 361.1137 | -5.6995 | 18.3709 | 0.91 | Stem Fruit Leaf Root |
| 2,4,6-Tri-(6-aminocaproic acid)-1,3,5-triazine                                                                                                                                                                                 | Organic acids and derivatives | Carboxylic acids and derivatives    | Amino acids, peptides, and analogues | C21H36N6O6                | [M + H] <sup>+</sup>  | 469.2768 | 469.2732 | -7.7826 | 25.4036 | 0.9  | Stem Leaf Root       |
| 3-hydroxy-4-[2-(3-hydroxy-4-{3-methyl-2-[3-methyl-2-(3-methylbutanamido)butanamido]butanamido)-5-phenylpentanamido]propanamido]-5-phenylpentanoic acid                                                                         | Organic acids and derivatives | Carboxylic acids and derivatives    | Amino acids, peptides, and analogues | C40H59N5O9                | [M + H] <sup>+</sup>  | 754.4385 | 754.4379 | -0.8317 | 12.4928 | 0.9  | Root                 |
| Cyclo(D-alanyl-L-leucyl-L-leucyl-D-leucyl-L-valyl)                                                                                                                                                                             | Organic acids and derivatives | Carboxylic acids and derivatives    | Amino acids, peptides, and analogues | C26H47N5O5                | [M + Na] <sup>+</sup> | 532.3475 | 532.3464 | -1.9985 | 26.3013 | 0.89 | Stem Leaf Root       |
| (2R)-2-[2-[[[(2R,3R,4R,5S,6R)-3-acetamido-4,5-diacetyloxy-6-(acetyloxymethyl)oxan-2-yl]carbamothioylamino]ethyl-(4-phenylphenyl)sulfonylamino]-3-methylbutanoic acid                                                           | Organic acids and derivatives | Carboxylic acids and derivatives    | Amino acids, peptides, and analogues | C34H44N4O12S <sub>2</sub> | [M + K] <sup>+</sup>  | 803.2034 | 803.2046 | 1.4301  | 14.872  | 0.89 | Leaf                 |
| (4S)-4-amino-5-[[[(2S,3S)-1-[[[(2S)-1-[[[(2S,3R)-4-[[[(1S)-1-carboxybutyl]amino]-3-hydroxy-4-oxo-1-thiophen-2-ylbutan-2-yl]amino]-1-oxo-3-thiophen-2-ylpropan-2-yl]amino]-3-methyl-1-oxopentan-2-yl]amino]-5-oxopentanoic acid | Organic acids and derivatives | Peptidomimetics                     | Depsipeptides                        | C31H45N5O9S2              | [M + Na] <sup>+</sup> | 718.2556 | 718.2607 | 6.976   | 15.8555 | 0.89 | Stem Leaf Root       |
| [(2S)-3-(4-butoxycarbonylpiperazin-1-yl)-2-[[6-[(3S)-3-methoxypyrrolidin-1-yl]-2-phenylpyrimidine-4-carbonyl]amino]-3-oxopropyl]phosphonic acid                                                                                | Organic acids and derivatives | Carboxylic acids and derivatives    | Amino acids, peptides, and analogues | C28H39N6O8P               | [M + Na] <sup>+</sup> | 641.2465 | 641.2502 | 5.8194  | 19.2733 | 0.89 | Stem Fruit Leaf Root |

|                                                                                                                                                                 |                                 |                                  |                                      |             |                       |          |          |         |         |      |                |
|-----------------------------------------------------------------------------------------------------------------------------------------------------------------|---------------------------------|----------------------------------|--------------------------------------|-------------|-----------------------|----------|----------|---------|---------|------|----------------|
| Solanamide A                                                                                                                                                    | Organic acids and derivatives   | Carboxylic acids and derivatives | Amino acids, peptides, and analogues | C30H46N4O6  | [M + H] <sup>+</sup>  | 559.3489 | 559.3451 | -6.9204 | 19.0232 | 0.89 | Stem Leaf Root |
| 9a-(hydroxymethyl)-1-(5-hydroxyoxolan-3-yl)-11a-methyl-7-[(3,4,5-trihydroxy-6-methyloxan-2-yl)oxy]-hexadecahydro-1H-cyclopenta[a]phenanthrene-3a,5a,9,10-tetrol | Lipids and lipid-like molecules | Prenol lipids                    | Terpene glycosides                   | C29H48O12   | [M + Na] <sup>+</sup> | 611.3043 | 611.3078 | 5.5884  | 19.6101 | 0.89 | Stem Leaf Root |
| 2,4,12-Octadecatrienamamide, N-(2-methylpropyl)-, (2E,4E,12Z)-                                                                                                  | Lipids and lipid-like molecules | Prenol lipids                    | Diterpenoids                         | C22H39NO    | [M + H] <sup>+</sup>  | 334.3104 | 334.3086 | -5.1822 | 29.667  | 0.88 | Leaf           |
| O-Specific antigen, YR                                                                                                                                          | Lipids and lipid-like molecules | Fatty Acyls                      | Fatty amides                         | C29H47N3O18 | [M + Na] <sup>+</sup> | 748.2752 | 748.2713 | -5.307  | 16.1373 | 0.88 | Stem Leaf Root |
| Phenylalanyl-arginyl-arginine                                                                                                                                   | Organic oxygen compounds        | Organooxygen compounds           | Alcohols and polyols                 | C21H35N9O4  | [M + Na] <sup>+</sup> | 500.271  | 500.2706 | -0.681  | 13.4261 | 0.88 | Leaf           |
| 4-amino-2-[(2,4-diamino-5-[[3-amino-6-(aminomethyl)-3,4-dihydro-2H-pyran-2-yl]oxy]-3,6-dihydroxycyclohexyl)oxy]-5-methyloxane-3,5-diol                          | Lipids and lipid-like molecules | Fatty Acyls                      | Fatty amides                         | C18H35N5O8  | [M + Na] <sup>+</sup> | 472.2383 | 472.2394 | 2.2618  | 11.1929 | 0.88 | Fruit Leaf     |
| 2-[2-[[1-[2-amino-3-(4-hydroxyphenyl)propanoyl]pyrrolidine-2-carbonyl]amino]propanoylamino]-4-methylpentanoic acid                                              | Organic acids and derivatives   | Carboxylic acids and derivatives | Amino acids, peptides, and analogues | C23H34N4O6  | [M + Na] <sup>+</sup> | 485.2376 | 485.2408 | 6.5067  | 13.7453 | 0.88 | Leaf Root      |
| 5-Adenosyl-1,12-diamino-3-thio-9-azadodecane                                                                                                                    | Organoheterocyclic compounds    | Azoles                           | Unassigned                           | C21H38N8O3S | [M + Na] <sup>+</sup> | 505.2685 | 505.2674 | -2.2079 | 22.9997 | 0.88 | Leaf           |
| 4-tert-Butylcalix[5]arene                                                                                                                                       | Organic acids and derivatives   | Carboxylic acids and derivatives | Amino acids, peptides, and analogues | C55H70O5    | [M + Na] <sup>+</sup> | 833.5121 | 833.5154 | 3.9555  | 34.0923 | 0.87 | Leaf Root      |
| 5-(4-ethylphenyl)-4-[hydroxy-(3-methyl-4-propan-2-yloxyphenyl)methylidene]-1-(3-morpholin-4-ylpropyl)pyrrolidine-2,3-dione                                      | Organic acids and derivatives   | Carboxylic acids and derivatives | Amino acids, peptides, and analogues | C30H38N2O5  | [M + Na] <sup>+</sup> | 529.2678 | 529.2643 | -6.6256 | 11.6882 | 0.87 | Root           |

|                                                                                                                                                                                                                                                                                                                |                                 |                                  |                                           |              |                            |          |          |         |         |      |                      |
|----------------------------------------------------------------------------------------------------------------------------------------------------------------------------------------------------------------------------------------------------------------------------------------------------------------|---------------------------------|----------------------------------|-------------------------------------------|--------------|----------------------------|----------|----------|---------|---------|------|----------------------|
| N-[1-amino-3-(1H-indol-3-yl)-1-oxopropan-2-yl]-3-(cyclohexylcarbamoylamino)-1-(pyrazine-2-carbonyl)pyrrolidine-2-carboxamide                                                                                                                                                                                   | Organic acids and derivatives   | Carboxylic acids and derivatives | Amino acids, peptides, and analogues      | C28H34N8O4   | [M + H3N + H] <sup>+</sup> | 564.3047 | 564.3019 | -4.8582 | 11.7575 | 0.86 | Root                 |
| 4-[[[1-methylethyl]carbamoyl]amino]-1-[[1-methyl-1H-pyrrol-2-yl]carbonyl]prolyl-O-methyltyrosinamide                                                                                                                                                                                                           | Organic acids and derivatives   | Carboxylic acids and derivatives | Amino acids, peptides, and analogues      | C25H34N6O5   | [M + Na] <sup>+</sup>      | 521.2488 | 521.2522 | 6.3856  | 19.7843 | 0.86 | Leaf Root            |
| L-isoleucyl-L-leucyl-L-valyl-L-tyrosine                                                                                                                                                                                                                                                                        | Organic acids and derivatives   | Carboxylic acids and derivatives | Carboxylic acid derivatives               | C26H42N4O6   | [M + Na] <sup>+</sup>      | 529.3002 | 529.3026 | 4.5326  | 24.668  | 0.86 | Stem Leaf Root       |
| 2-[6-amino-8-[2-(1H-indol-3-ylmethylidene)hydrazinyl]purin-9-yl]-5-(hydroxymethyl)oxolane-3,4-diol                                                                                                                                                                                                             | Organic oxygen compounds        | Organooxygen compounds           | Carbohydrates and carbohydrate conjugates | C19H20N8O4   | [M + H] <sup>+</sup>       | 425.168  | 425.1658 | -5.0948 | 22.255  | 0.86 | Root                 |
| 1,3-bis[[3-methylbutanoyl]oxy]propan-2-yl 13-methyltetradecanoate                                                                                                                                                                                                                                              | Lipids and lipid-like molecules | Glycerolipids                    | Triradylglycerols                         | C28H52O6     | [M + Na] <sup>+</sup>      | 507.3662 | 507.3653 | -1.6081 | 20.6454 | 0.85 | Stem Leaf Root       |
| Ala-Gly-Leu-Leu-Gly-Gly                                                                                                                                                                                                                                                                                        | Organic acids and derivatives   | Carboxylic acids and derivatives | Amino acids, peptides, and analogues      | C21H38N6O7   | [M + H] <sup>+</sup>       | 487.2874 | 487.2838 | -7.4617 | 24.8763 | 0.85 | Leaf Root            |
| 2''-amino-17'-(hydroxymethyl)-5''-[[2-(hydroxymethyl)-5-[(methylamino)methyl]phenyl]methyl]-18'-(3-hydroxypropyl)-2'-methyl-5'',6''-dihydro-1''H-dispiro[cyclohexane-1,7'-[5,6]dithiatetracyclo[10.6.2.0 <sup>1</sup> , <sup>3</sup> .0 <sup>2</sup> , <sup>1</sup> ?]icosane-8',4''-pyrimidin]-12'-en-20'-one | Lipids and lipid-like molecules | Steroids and steroid derivatives | Unassigned                                | C41H62N4O4S2 | [M + H] <sup>+</sup>       | 739.4284 | 739.4247 | -5.0531 | 18.4893 | 0.85 | Stem Fruit Leaf Root |
| 2-[[[(2S)-2-[[[(2S)-2-[[[2-hydroxy-3-(methylamino)decanoyl]amino]-3-methylbutanoyl]-methylamino]-3-methylbutanoyl]-methylamino]-3-(4-                                                                                                                                                                          | Organic acids and derivatives   | Carboxylic acids and derivatives | Amino acids, peptides, and analogues      | C41H63N5O9   | [M + Na] <sup>+</sup>      | 792.4523 | 792.4473 | -6.42   | 18.3326 | 0.85 | Fruit Leaf Root      |

|                                                                                                                                                                                                                 |                                 |                                  |                                           |              |                       |          |          |         |         |      |                      |
|-----------------------------------------------------------------------------------------------------------------------------------------------------------------------------------------------------------------|---------------------------------|----------------------------------|-------------------------------------------|--------------|-----------------------|----------|----------|---------|---------|------|----------------------|
| hydroxyphenyl)propanoyl]amino]-3-(4-hydroxyphenyl)propanoic acid                                                                                                                                                |                                 |                                  |                                           |              |                       |          |          |         |         |      |                      |
| N(1),N(8)-bis(caffeoyl)spermidine                                                                                                                                                                               | Organic acids and derivatives   | Carboxylic acids and derivatives | Amino acids, peptides, and analogues      | C25H31N3O6   | [M + H] <sup>+</sup>  | 470.2285 | 470.2269 | -3.4203 | 11.0801 | 0.84 | Stem Fruit Leaf      |
| (2S)-N-[(2S,3S)-1-[[[(2S)-1-[[[(2S)-5-amino-1,5-dioxopentan-2-yl]amino]-1-oxopropan-2-yl]amino]-3-methyl-1-oxopentan-2-yl]-1-[(2S)-2-[[[(2S)-2-aminopropanoyl]amino]-3-methylbutanoyl]pyrrolidine-2-carboxamide | Organic acids and derivatives   | Carboxylic acids and derivatives | Amino acids, peptides, and analogues      | C27H47N7O7   | [M + Na] <sup>+</sup> | 604.3435 | 604.3441 | 1.1301  | 20.4649 | 0.84 | Fruit Leaf Root      |
| Prostaglandin E2-biotinamide                                                                                                                                                                                    | Organoheterocyclic compounds    | Biotin and derivatives           | Unassigned                                | C35H58N4O6S  | [M + H] <sup>+</sup>  | 663.4149 | 663.4132 | -2.5971 | 27.8753 | 0.84 | Leaf                 |
| Impulsin                                                                                                                                                                                                        | Lipids and lipid-like molecules | Fatty Acyls                      | Fatty amides                              | C18H37NO2    | [M + Na] <sup>+</sup> | 322.2722 | 322.2729 | 2.1813  | 27.1344 | 0.84 | Stem Leaf            |
| Dusquetide                                                                                                                                                                                                      | Lipids and lipid-like molecules | Steroids and steroid derivatives | Unassigned                                | C25H47N9O5   | [M + Na] <sup>+</sup> | 576.3598 | 576.3645 | 8.1299  | 17.0995 | 0.83 | Fruit                |
| 2,2,6b,9,9,12a,14a-heptamethyl-10,11-dipropanoyl-docosahydricene-4a-carboxylic acid                                                                                                                             | Lipids and lipid-like molecules | Prenol lipids                    | Triterpenoids                             | C36H58O4     | [M + Na] <sup>+</sup> | 577.4233 | 577.4236 | 0.5846  | 17.3742 | 0.83 | Root                 |
| 3beta-[4-O-(3-O-Methyl-6-deoxy-beta-D-allopyranosyl)-2,6-dideoxy-beta-D-arabinohexopyranosyloxy]-8,11,12,14-tetrahydroxypregna-5-ene-20-one                                                                     | Organic oxygen compounds        | Organooxygen compounds           | Carbohydrates and carbohydrate conjugates | C34H54O13    | [M + Na] <sup>+</sup> | 693.3462 | 693.3473 | 1.5422  | 12.9701 | 0.83 | Stem Fruit Leaf Root |
| Cyclo(grgdspa)                                                                                                                                                                                                  | Organic acids and derivatives   | Carboxylic acids and derivatives | Amino acids, peptides, and analogues      | C24H38N10O12 | [M + Na] <sup>+</sup> | 681.2568 | 681.2554 | -2.1166 | 16.8498 | 0.83 | Stem Fruit Leaf Root |

|                                                                                                                                                                                                                                                                        |                               |                                  |                                           |             |                            |          |          |         |         |      |                 |
|------------------------------------------------------------------------------------------------------------------------------------------------------------------------------------------------------------------------------------------------------------------------|-------------------------------|----------------------------------|-------------------------------------------|-------------|----------------------------|----------|----------|---------|---------|------|-----------------|
| [2-(2,5-Dioxo-hexahydro-imidazo[4,5-d]imidazol-1-yl)-acetyl-amino]-acetic acid                                                                                                                                                                                         | Organic oxygen compounds      | Organooxygen compounds           | Carbohydrates and carbohydrate conjugates | C8H11N5O5   | [M + H3N + H] <sup>+</sup> | 275.1104 | 275.1119 | 5.3311  | 13.0406 | 0.82 | Root            |
| Thr-Val-Glu-Glu-Val-Asp                                                                                                                                                                                                                                                | Organic acids and derivatives | Carboxylic acids and derivatives | Amino acids, peptides, and analogues      | C28H46N6O14 | [M + K] <sup>+</sup>       | 729.2709 | 729.2758 | 6.7485  | 16.0209 | 0.81 | Stem Leaf Root  |
| [(6R,8Z,10R,11R,12S,13S,14S,15R,17R,18E,21S)-4-ethoxy-2,6,14,28-tetrahydroxy-10-methoxy-3,11,13,15,17,21-hexamethyl-25-[[[4-methylpiperazin-1-yl]amino]methyl]-16,22-dioxo-7-oxa-23-azatricyclo[22.3.1.05,27]octacosan-1(27),2,4,8,18,24(28),25-heptaen-12-yl] acetate | Organic acids and derivatives | Carboxylic acids and derivatives | Amino acids, peptides, and analogues      | C43H64N4O11 | [M + H] <sup>+</sup>       | 813.4644 | 813.4662 | 2.2628  | 26.8255 | 0.81 | Leaf            |
| [(2S)-2-tridecanoyloxy-3-[(2R,3S,4S,5R,6S)-3,4,5-trihydroxy-6-(hydroxymethyl)oxan-2-yl]oxypropyl] tetradecanoate                                                                                                                                                       | Organic oxygen compounds      | Organooxygen compounds           | Carbohydrates and carbohydrate conjugates | C36H68O10   | [M + H] <sup>+</sup>       | 661.4884 | 661.4879 | -0.8635 | 20.6653 | 0.81 | Stem Leaf Root  |
| N,N''-Bis(1-cyclohexyl-5-allyl-5-propylidenebarbituryl)diaminoguanidine                                                                                                                                                                                                | Organic acids and derivatives | Carboxylic acids and derivatives | Amino acids, peptides, and analogues      | C33H47N9O6  | [M + H] <sup>+</sup>       | 666.3721 | 666.3725 | 0.5262  | 24.5585 | 0.8  | Leaf            |
| Glyoxyloyl carbocysteine                                                                                                                                                                                                                                               | Organic acids and derivatives | Carboxylic acids and derivatives | Carboxylic acids                          | C7H9NO6S    | [M + H3N + H] <sup>+</sup> | 253.0494 | 253.0519 | 9.9074  | 21.0057 | 0.8  | Stem Leaf Root  |
| [6-(hexadec-7-enoyloxy)-3,4,5-trihydroxyoxan-2-yl]methyl octadecanoate                                                                                                                                                                                                 | Organic acids and derivatives | Carboxylic acids and derivatives | Amino acids, peptides, and analogues      | C33H50N8O7  | [M + K] <sup>+</sup>       | 709.344  | 709.3433 | -0.8755 | 12.5007 | 0.8  | Fruit Leaf Root |
| 5-(3-ethoxy-4-hydroxyphenyl)-3-hydroxy-1-(2-methoxyethyl)-4-[[3-methyl-4-(methylethoxy)phenyl]carbonyl]-3-pyrrolin-2-one                                                                                                                                               | Organic acids and derivatives | Carboxylic acids and derivatives | Amino acids, peptides, and analogues      | C26H31NO7   | [M + Na] <sup>+</sup>      | 492.1998 | 492.2025 | 5.4188  | 19.0439 | 0.79 | Stem Leaf Root  |

|                                                                                                                                                                                                                                                                    |                                 |                                  |                                           |             |                            |          |          |         |         |      |                         |
|--------------------------------------------------------------------------------------------------------------------------------------------------------------------------------------------------------------------------------------------------------------------|---------------------------------|----------------------------------|-------------------------------------------|-------------|----------------------------|----------|----------|---------|---------|------|-------------------------|
| 5-[[4-[5-[[4-[5-[acetyl(hydroxyamino)pentylamino]-4-oxobutanoyl]-hydroxyamino]pentylamino]-4-oxobutanoyl]-hydroxyamino]pentanoic acid                                                                                                                              | Organic oxygen compounds        | Organooxygen compounds           | Carbohydrates and carbohydrate conjugates | C25H45N5O10 | [M + H3N + H] <sup>+</sup> | 593.351  | 593.3552 | 7.1221  | 19.9038 | 0.79 | Leaf Root               |
| Ethyl 4-sulfonamidonaphthyl sulfone                                                                                                                                                                                                                                | Organic oxygen compounds        | Organooxygen compounds           | Carbohydrates and carbohydrate conjugates | C12H13NO4S2 | [M + H3N + H] <sup>+</sup> | 317.063  | 317.0645 | 4.8779  | 11.9577 | 0.79 | Stem Leaf               |
| (2S)-N-[[[(2S)-1-[[[(2S)-6-amino-1-oxohexan-2-yl]amino]-3-(4-hydroxyphenyl)-1-oxopropan-2-yl]amino]-3-methyl-1-oxobutan-2-yl]-2-[[[(2S)-2-aminopropanoyl]amino]-4-methylpentanamide                                                                                | Organic acids and derivatives   | Peptidomimetics                  | Depsipeptides                             | C29H48N6O6  | [M + H] <sup>+</sup>       | 577.3707 | 577.3706 | -0.3068 | 19.421  | 0.79 | Stem Fruit<br>Leaf Root |
| [(4R,9R,10R,14R)-14-hydroxy-5,5,9-trimethyl-14-tetracyclo[11.2.1.01,10.04,9]hexadecanyl]methyl (4S,6R,9S,10R)-6-acetyloxy-5,5,9-trimethyltetracyclo[11.2.1.01,10.04,9]hexadecane-14-carboxylate                                                                    | Lipids and lipid-like molecules | Glycerolipids                    | Diradylglycerols                          | C42H66O5    | [M + Na] <sup>+</sup>      | 673.4808 | 673.4814 | 0.8734  | 33.8691 | 0.79 | Stem Fruit<br>Root      |
| Ala-Arg-Thr-Nle(tBu)-Ala-al                                                                                                                                                                                                                                        | Organic acids and derivatives   | Carboxylic acids and derivatives | Amino acids, peptides, and analogues      | C26H50N8O6  | [M + Na] <sup>+</sup>      | 593.3751 | 593.3696 | -9.2341 | 22.2828 | 0.79 | Root                    |
| [(2S,3R,4S,5S,6R)-3,4,5-trihydroxy-6-(hydroxymethyl)oxan-2-yl] (1S,3S,4S,6S,7S,11S,12S,14S,15R,16R)-15-[(2S,5S)-2,5-dihydroxy-5-(hydroxymethyl)-6-methylheptan-2-yl]-4,6,14-trihydroxy-7,12,16-trimethylpentacyclo[9.7.0.01,3.03,8.012,16]octadecane-7-carboxylate | Lipids and lipid-like molecules | Steroids and steroid derivatives | Bile acids, alcohols and derivatives      | C37H62O13   | [M + Na] <sup>+</sup>      | 737.4088 | 737.4127 | 5.2837  | 16.9392 | 0.78 | Root                    |



|                                                                                                                                                                                                                                                                    |                               |                                     |                                           |              |                            |          |          |         |         |      |                |
|--------------------------------------------------------------------------------------------------------------------------------------------------------------------------------------------------------------------------------------------------------------------|-------------------------------|-------------------------------------|-------------------------------------------|--------------|----------------------------|----------|----------|---------|---------|------|----------------|
| 4,4''-(4,4''-Bipyridine-1,1''-diyl)bis(2,6-diaminopyrimidine 1-oxide)                                                                                                                                                                                              | Organic acids and derivatives | Carboxylic acids and derivatives    | Amino acids, peptides, and analogues      | C18H28N10O2  | [M + H] <sup>+</sup>       | 417.2469 | 417.2473 | 1.0362  | 13.453  | 0.78 | Leaf Root      |
| Ala-Ser-Leu-Ser(PO3H2)-Ala-Pro-Gly-al                                                                                                                                                                                                                              | Organic acids and derivatives | Carboxylic acids and derivatives    | Amino acids, peptides, and analogues      | C25H44N7O12P | [M + Na] <sup>+</sup>      | 688.2683 | 688.2648 | -5.1311 | 15.9686 | 0.78 | Stem Leaf Root |
| N-({2-[4-(isobutylamino)benzoyl]hydrazino}carbonothioyl)-2-thiophenecarboxamide                                                                                                                                                                                    | Benzenoids                    | Benzene and substituted derivatives | Benzenesulfonamides                       | C17H18N4O3S2 | [M + K] <sup>+</sup>       | 429.0457 | 429.0436 | -4.9157 | 20.0075 | 0.78 | Leaf           |
| 3''-Nitro-4''-(lauryloxy)biphenyl-4-carboxylic acid                                                                                                                                                                                                                | Benzenoids                    | Benzene and substituted derivatives | Phenoxy compounds                         | C31H45NO5    | [M + Na] <sup>+</sup>      | 534.3195 | 534.3191 | -0.7541 | 24.9303 | 0.77 | Stem Leaf Root |
| Decyl- A-D-maltoside                                                                                                                                                                                                                                               | Organic oxygen compounds      | Organooxygen compounds              | Carbohydrates and carbohydrate conjugates | C22H42O11    | [M + H] <sup>+</sup>       | 483.2799 | 483.2756 | -8.8566 | 25.81   | 0.77 | Leaf Root      |
| 3-({6-[2-amino-3-(methylazaniumyl)propoxy]-3,4-dihydroxy-5-{5,7,11,19-tetraoxapentacyclo[10.8.0.0 <sup>2</sup> ,1 <sup>?</sup> .0 <sup>?</sup> ,?..0 <sup>13</sup> ,1 <sup>?</sup> ]icosa-2(10),3,8,13,15,17-hexaen-15-ylperoxy}oxan-2-yl}methoxy)-3-oxopropanoate | Organic oxygen compounds      | Organooxygen compounds              | Carbohydrates and carbohydrate conjugates | C29H34N2O14  | [M + Na] <sup>+</sup>      | 657.1908 | 657.1931 | 3.5241  | 17.016  | 0.77 | Leaf           |
| N-[(Benzyloxy)carbonyl]-L-Leucyl-N-[(3s)-5-Methyl-1-(Methylsulfonyl)hexan-3-yl]-L-Leucinamide                                                                                                                                                                      | Organic acids and derivatives | Carboxylic acids and derivatives    | Amino acids, peptides, and analogues      | C28H47N3O7S  | [M + H] <sup>+</sup>       | 570.3207 | 570.3163 | -7.7507 | 16.1762 | 0.76 | Leaf Root      |
| 6-[2,5-dihydroxy-7-methoxy-1-(3-methylbut-2-enyl)-9,10-dihydrophenanthren-3-yl]-7-methoxy-1-(3-methylbut-2-enyl)-9,10-dihydrophenanthrene-2,5-diol                                                                                                                 | Benzenoids                    | Benzene and substituted derivatives | Unassigned                                | C40H42O6     | [M + K] <sup>+</sup>       | 657.2618 | 657.2653 | 5.2965  | 21.0075 | 0.76 | Leaf Root      |
| 1H-Indazole-3-carboxamide, 1-(1-methylethyl)-N-(2-(4-((tricyclo(3.3.1.1 <sup>3</sup> ,7)dec-1-                                                                                                                                                                     | Organic acids and derivatives | Carboxylic acids and derivatives    | Amino acids, peptides, and analogues      | C29H41N5O2   | [M + H3N + H] <sup>+</sup> | 509.3604 | 509.3637 | 6.4224  | 18.7357 | 0.76 | Leaf           |

|                                                                                                                                                                                                                                                                             |                                 |                                  |                                           |             |                       |          |          |         |         |      |                      |
|-----------------------------------------------------------------------------------------------------------------------------------------------------------------------------------------------------------------------------------------------------------------------------|---------------------------------|----------------------------------|-------------------------------------------|-------------|-----------------------|----------|----------|---------|---------|------|----------------------|
| ylcarbonyl)amino)-1-piperidinyl)ethyl)-                                                                                                                                                                                                                                     |                                 |                                  |                                           |             |                       |          |          |         |         |      |                      |
| (1R,4E,6S,7R,8S,10R,11R,12S,14R,15S,16R,18E,20E,22R,25S,29S,30S,32S,33S,34S)-22-ethyl-7,11,14,15-tetrahydroxy-30-[(2R)-2-hydroxypropyl]-6,8,10,12,14,16,29,33,34-nonamethyl-2,31-dioxo-26-oxoniatetracyclo[23.8.1.026,32.027,32]tetratriaconta-4,18,20-triene-3,9,13-trione | Lipids and lipid-like molecules | Sphingolipids                    | Ceramides                                 | C45H72O11   | [M + H] <sup>+</sup>  | 789.5147 | 789.5149 | 0.3138  | 28.7872 | 0.76 | Leaf                 |
| Gly-Asn-Asn-Ser-Tyr-Ser                                                                                                                                                                                                                                                     | Organic acids and derivatives   | Carboxylic acids and derivatives | Amino acids, peptides, and analogues      | C25H36N8O12 | [M + H] <sup>+</sup>  | 641.2525 | 641.2506 | -2.9692 | 15.4567 | 0.75 | Stem Fruit Leaf Root |
| 1-Palmitoyl-2-myristoyl-3-myristoleoyl-glycerol                                                                                                                                                                                                                             | Lipids and lipid-like molecules | Glycerolipids                    | Triradylglycerols                         | C47H88O6    | [M + Na] <sup>+</sup> | 771.6479 | 771.6448 | -3.9883 | 29.4395 | 0.75 | Leaf                 |
| 16-benzyl-8,14,17-trioxo-6-(5-oxopyrrolidine-2-carbonyl)-2-oxa-6,9,15,18-tetraazatetracyclo[19.2.2.0 <sup>3</sup> ,?.0 <sup>7</sup> , <sup>13</sup> ]pentacosa-1(23),21,24-triene-19-carboxylic acid                                                                        | Organic acids and derivatives   | Carboxylic acids and derivatives | Amino acids, peptides, and analogues      | C33H37N5O8  | [M + Na] <sup>+</sup> | 654.254  | 654.2545 | 0.8161  | 17.0611 | 0.75 | Stem Leaf Root       |
| 2,3,4,5-tetrahydroxy-6-(hydroxymethyl)cyclohexyl tetracosanoate                                                                                                                                                                                                             | Lipids and lipid-like molecules | Prenol lipids                    | Tetraterpenoids                           | C31H60O7    | [M + Na] <sup>+</sup> | 567.4237 | 567.4201 | -6.3295 | 29.1768 | 0.74 | Leaf                 |
| Solphenazine F                                                                                                                                                                                                                                                              | Organic oxygen compounds        | Organooxygen compounds           | Carbohydrates and carbohydrate conjugates | C25H30N2O10 | [M + Na] <sup>+</sup> | 541.1798 | 541.1785 | -2.5104 | 14.1364 | 0.74 | Root                 |
| L-Prolinamide, N-(1-oxo-2-propylpentyl)-L-alpha-aspartyl-N-(4-((aminoiminomethyl)amino)-1-formylbutyl)-, (S)-                                                                                                                                                               | Organic acids and derivatives   | Carboxylic acids and derivatives | Amino acids, peptides, and analogues      | C23H40N6O6  | [M + H] <sup>+</sup>  | 497.3081 | 497.3084 | 0.6254  | 25.5829 | 0.74 | Stem Fruit Leaf Root |
| 2-({bicyclo[3.1.1]heptan-2-ylidene}methoxy)-6-{[(3,4,5-trihydroxyoxan-2-yl)oxy]methyl}oxane-3,4,5-triol                                                                                                                                                                     | Organic oxygen compounds        | Organooxygen compounds           | Carbohydrates and carbohydrate conjugates | C19H30O10   | [M + H] <sup>+</sup>  | 419.1911 | 419.1888 | -5.549  | 14.9155 | 0.74 | Stem Leaf            |

|                                                                                                                                                                                                             |                                 |                                     |                                           |              |                       |          |          |         |         |      |                 |
|-------------------------------------------------------------------------------------------------------------------------------------------------------------------------------------------------------------|---------------------------------|-------------------------------------|-------------------------------------------|--------------|-----------------------|----------|----------|---------|---------|------|-----------------|
| 3,7-O-diacetyl-5,14-O-dibenzoyl-13,17-oxypremyrsinol                                                                                                                                                        | Organoheterocyclic compounds    | Naphthopyrans                       | Unassigned                                | C38H44O10    | [M + H] <sup>+</sup>  | 661.3006 | 661.3025 | 2.8534  | 29.6017 | 0.74 | Leaf            |
| (3r,3as,4r,6ar)-4-(2-Methoxyethoxy)hexahydrofuro[2,3-B]furan-3-yl {(2s,3r)-3-Hydroxy-4-[[[(2z)-2-(Methylimino)-2,3-Dihydro-1,3-Benzoxazol-6-yl]sulfonyl](2-Methylpropyl)amino]-1-Phenylbutan-2-yl}carbamate | Organic acids and derivatives   | Carboxylic acids and derivatives    | Amino acids, peptides, and analogues      | C32H44N4O10S | [M + H] <sup>+</sup>  | 677.285  | 677.2813 | -5.4887 | 16.7803 | 0.73 | Stem Leaf       |
| Vicibactin-7101                                                                                                                                                                                             | Lipids and lipid-like molecules | Glycerolipids                       | Triradylglycerols                         | C27H48N6O12  | [M + H] <sup>+</sup>  | 649.3402 | 649.3458 | 8.5582  | 24.5585 | 0.73 | Leaf            |
| Dibekacin 2''-phosphate                                                                                                                                                                                     | Organic acids and derivatives   | Carboxylic acids and derivatives    | Amino acids, peptides, and analogues      | C18H38N5O11P | [M + Na] <sup>+</sup> | 554.2203 | 554.2202 | -0.2334 | 14.2967 | 0.72 | Fruit Leaf      |
| Benzyl-dodecyl-bis(2-hydroxypropyl)azanum                                                                                                                                                                   | Lipids and lipid-like molecules | Fatty Acyls                         | Fatty amides                              | C25H45NO2    | [M + Na] <sup>+</sup> | 414.3348 | 414.3354 | 1.4494  | 13.2563 | 0.72 | Fruit Root      |
| Oligomycin                                                                                                                                                                                                  | Organic oxygen compounds        | Organooxygen compounds              | Carbohydrates and carbohydrate conjugates | C45H74O11    | [M + Na] <sup>+</sup> | 813.5129 | 813.5114 | -1.7864 | 29.326  | 0.72 | Leaf            |
| [4-[(1-hydroxy-2-oxoazepan-3-yl)amino]-4-oxobutan-2-yl] 2-[[2-(2,3-dihydroxyphenyl)-4-methyl-5H-1,3-oxazole-4-carbonyl]amino]-6-[hydroxy-[(Z)-tetradec-5-enoyl]amino]hexanoate                              | Organic acids and derivatives   | Carboxylic acids and derivatives    | Amino acids, peptides, and analogues      | C41H63N5O11  | [M + Na] <sup>+</sup> | 824.4422 | 824.4423 | 0.0999  | 14.2684 | 0.72 | Fruit Root      |
| dapt                                                                                                                                                                                                        | Benzenoids                      | Benzene and substituted derivatives | Halobenzenes                              | C23H26F2N2O4 | [M + Na] <sup>+</sup> | 455.1758 | 455.1784 | 5.7047  | 15.2046 | 0.72 | Fruit Leaf Root |
| Lexamine S 13                                                                                                                                                                                               | Organic acids and derivatives   | Carboxylic acids and derivatives    | Amino acids, peptides, and analogues      | C23H48N2O    | [M + H] <sup>+</sup>  | 369.3839 | 369.3831 | -2.0471 | 29.8801 | 0.71 | Leaf Root       |

|                                                                                                             |                                 |                                  |                                           |            |                            |          |          |         |         |      |                |
|-------------------------------------------------------------------------------------------------------------|---------------------------------|----------------------------------|-------------------------------------------|------------|----------------------------|----------|----------|---------|---------|------|----------------|
| [2-[2-[4,4-bis(hydroxymethyl)-5H-1,3-oxazol-2-yl]icos-4-enyl]-4-(hydroxymethyl)-5H-1,3-oxazol-4-yl]methanol | Benzenoids                      | Unassigned                       | Unassigned                                | C30H54N2O6 | [M + Na] <sup>+</sup>      | 561.388  | 561.3853 | -4.7629 | 27.6624 | 0.71 | Stem Leaf Root |
| Hexadecaphytosphingosine                                                                                    | Organic nitrogen compounds      | Organonitrogen compounds         | Amines                                    | C16H35NO3  | [M + Na] <sup>+</sup>      | 312.2515 | 312.253  | 4.8324  | 26.9673 | 0.71 | Stem Leaf Root |
| Proferrioxamine G1t                                                                                         | Organic acids and derivatives   | Carboxylic acids and derivatives | Amino acids, peptides, and analogues      | C23H46N6O7 | [M + K] <sup>+</sup>       | 557.3065 | 557.3074 | 1.6312  | 25.8366 | 0.71 | Stem Leaf Root |
| 1-(9Z-tetradecenoyl)-glycero-3-phospho-(1''-myo-inositol)                                                   | Organic oxygen compounds        | Organooxygen compounds           | Carbohydrates and carbohydrate conjugates | C23H43O12P | [M + Na] <sup>+</sup>      | 565.239  | 565.2343 | -8.3104 | 21.6444 | 0.71 | Leaf Root      |
| (2S)-2,6-bis[[(3R)-3-isocyanododecanoyl]amino]hexanoic acid                                                 | Organic acids and derivatives   | Carboxylic acids and derivatives | Amino acids, peptides, and analogues      | C32H56N4O4 | [M + Na] <sup>+</sup>      | 583.4199 | 583.4157 | -7.1633 | 29.4395 | 0.71 | Leaf           |
| 6-[(2,4-dimethylpentan-3-yl)oxy]-3,4,5-trihydroxyoxane-2-carboxylic acid                                    | Organic oxygen compounds        | Organooxygen compounds           | Carbohydrates and carbohydrate conjugates | C13H24O7   | [M + H] <sup>+</sup>       | 293.1594 | 293.1606 | 4.0844  | 14.6466 | 0.71 | Root           |
| 2-(2-octadec-9-enoxyethoxy)ethanol                                                                          | Organic nitrogen compounds      | Organonitrogen compounds         | Amines                                    | C22H44O3   | [M + H3N + H] <sup>+</sup> | 374.3634 | 374.3631 | -0.7433 | 29.2847 | 0.71 | Fruit Leaf     |
| Dimethylaminopropyl palmitamide                                                                             | Organic acids and derivatives   | Carboxylic acids and derivatives | Amino acids, peptides, and analogues      | C21H44N2O  | [M + H] <sup>+</sup>       | 341.3526 | 341.3526 | -0.0209 | 27.8318 | 0.7  | Root           |
| 2-(2,2-dicyclopentylacetyl)oxyethyl-diethyl-octylazanium                                                    | Lipids and lipid-like molecules | Steroids and steroid derivatives | Steroidal alkaloids                       | C26H49NO2  | [M + Na] <sup>+</sup>      | 430.3661 | 430.362  | -9.4744 | 13.1038 | 0.7  | Root           |
| Ala-Gly-Tyr-Ala-Asn-Ala-Ala-al                                                                              | Organic acids and derivatives   | Carboxylic acids and derivatives | Amino acids, peptides, and analogues      | C27H40N8O9 | [M + Na] <sup>+</sup>      | 643.2816 | 643.2781 | -5.4952 | 22.7392 | 0.7  | Leaf           |
| [2-({4-[(2-amino-4-oxo-4,7-dihydro-3H-pyrrolo[2,3-d]pyrimidin-5-yl)methyl]benzene-1-                        | Organic acids and derivatives   | Carboxylic acids and derivatives | Amino acids, peptides, and analogues      | C23H21N5O5 | [M + H3N + H] <sup>+</sup> | 465.1886 | 465.1908 | 4.5431  | 14.9388 | 0.7  | Leaf           |

|                                                                                                                                                                                                 |                                 |                                  |                                      |              |                            |          |          |        |         |      |                      |
|-------------------------------------------------------------------------------------------------------------------------------------------------------------------------------------------------|---------------------------------|----------------------------------|--------------------------------------|--------------|----------------------------|----------|----------|--------|---------|------|----------------------|
| carbonyl]amino)-4-methoxyphenyl]acetic acid                                                                                                                                                     |                                 |                                  |                                      |              |                            |          |          |        |         |      |                      |
| [(2R,3S,4S,5R,6S)-3,4,5-trihydroxy-6-[(1S,2R)-2-hydroxy-2-(2-hydroxy-2-methylpropyl)-4,4,6,6-tetramethyl-3,5-dioxocyclohexyl]oxyoxan-2-yl]methyl 3,4,5-trihydroxybenzoate                       | Organic acids and derivatives   | Carboxylic acids and derivatives | Amino acids, peptides, and analogues | C27H38O14    | [M + Na] <sup>+</sup>      | 609.2159 | 609.2177 | 2.9512 | 11.7166 | 0.7  | Leaf Root            |
| Itraconazole                                                                                                                                                                                    | Organic acids and derivatives   | Carboxylic acids and derivatives | Amino acids, peptides, and analogues | C35H38F2N8O4 | [M + K] <sup>+</sup>       | 711.2621 | 711.2645 | 3.3028 | 16.0045 | 0.69 | Stem Leaf Root       |
| 33,34-dihydroxy-5,22-diazapentacyclo[16.16.1.0 <sup>1</sup> , <sup>22</sup> .0 <sup>2</sup> , <sup>27</sup> .0 <sup>3</sup> , <sup>37</sup> ]pentatriacont-10,26,29,31-tetraene-18-carbaldehyde | Organic acids and derivatives   | Carboxylic acids and derivatives | Amino acids, peptides, and analogues | C34H52N2O3   | [M + H] <sup>+</sup>       | 537.405  | 537.4089 | 7.1934 | 29.7347 | 0.69 | Leaf                 |
| N-[(3R,6S,9S,12R,14Z,16E)-9-[3-(diaminomethylideneamino)propyl]-6-ethyl-12-methyl-2,5,8,11-tetraoxo-3-phenyl-1,4,7,10-tetrazacyclooctadeca-14,16,18-trien-12-yl]-2-methylpropanamide            | Organic acids and derivatives   | Carboxylic acids and derivatives | Amino acids, peptides, and analogues | C31H44N8O5   | [M + Na] <sup>+</sup>      | 631.3332 | 631.337  | 5.9055 | 24.5585 | 0.69 | Leaf                 |
| 3-hydroxy-4-[17-(6-hydroxy-4,4,7a-trimethyl-2,4,5,6,7,7a-hexahydro-1-benzofuran-2-yl)-4,8,13-trimethyloctadeca-2,4,6,8,10,12,14,16-octaen-1-ylidene]-3,5,5-trimethylcyclohexyl acetate          | Lipids and lipid-like molecules | Prenol lipids                    | Tetraterpenoids                      | C43H60O5     | [M + H3N + H] <sup>+</sup> | 674.4784 | 674.4812 | 4.0646 | 19.4464 | 0.69 | Stem Leaf            |
| Phenyl beta-D-glucopyranoside                                                                                                                                                                   | Organic oxygen compounds        | Organooxygen compounds           | Alcohols and polyols                 | C12H16O6     | [M + H] <sup>+</sup>       | 257.1019 | 257.1021 | 0.6914 | 15.9855 | 0.69 | Fruit Leaf Root      |
| 5-methyltetrahydrofolyl polyglutamate                                                                                                                                                           | Organic acids and derivatives   | Carboxylic acids and derivatives | Amino acids, peptides, and analogues | C30H39N9O12  | [M + H] <sup>+</sup>       | 718.279  | 718.2816 | 3.5354 | 16.2858 | 0.69 | Stem Fruit Leaf Root |

|                                                                                                                                                                   |                                 |                                  |                                           |            |                            |          |          |         |         |      |                      |
|-------------------------------------------------------------------------------------------------------------------------------------------------------------------|---------------------------------|----------------------------------|-------------------------------------------|------------|----------------------------|----------|----------|---------|---------|------|----------------------|
| 7-[(2S)-2,3-dihydroxypropyl]-3H-purine-2,6-dione                                                                                                                  | Organoheterocyclic compounds    | Azoles                           | Unassigned                                | C8H10N4O4  | [M + Na] <sup>+</sup>      | 249.06   | 249.0614 | 5.6095  | 22.2335 | 0.69 | Leaf                 |
| K98 Polysaccharide                                                                                                                                                | Organic oxygen compounds        | Organooxygen compounds           | Carbohydrates and carbohydrate conjugates | C24H40O19  | [M + H] <sup>+</sup>       | 633.2236 | 633.2232 | -0.6724 | 23.5292 | 0.69 | Root                 |
| Terpendole E                                                                                                                                                      | Lipids and lipid-like molecules | Unassigned                       | Unassigned                                | C28H39NO3  | [M + H] <sup>+</sup>       | 438.3002 | 438.3013 | 2.5323  | 16.5111 | 0.69 | Fruit Leaf Root      |
| 6-[[4-(dimethylamino)-3-hydroxy-6-methyloxan-2-yl]oxy]-16-ethyl-4,10-dihydroxy-7-(2-hydroxyethyl)-5,9,13,15-tetramethyl-1-oxacyclohexadeca-11,13-dien-2-one       | Organic oxygen compounds        | Organooxygen compounds           | Carbohydrates and carbohydrate conjugates | C31H55NO8  | [M + Na] <sup>+</sup>      | 592.3825 | 592.384  | 2.4864  | 14.4001 | 0.68 | Fruit Leaf Root      |
| (3α,5β,7α,8xi,12α)-24-(4-Benzylpiperazin-1-yl)-3,7,12-trihydroxycholestan-24-one                                                                                  | Organic acids and derivatives   | Carboxylic acids and derivatives | Amino acids, peptides, and analogues      | C35H54N2O4 | [M + H3N + H] <sup>+</sup> | 584.4427 | 584.4453 | 4.3403  | 30.18   | 0.68 | Leaf                 |
| [3,8,14,17-tetrahydroxy-10,13-dimethyl-17-[1-(3-methylbutanoyloxy)ethyl]-1,2,3,4,5,6,7,9,11,12,15,16-dodecahydrocyclopenta[a]phenanthren-12-yl] 3-methylbutanoate | Organic oxygen compounds        | Organooxygen compounds           | Carbohydrates and carbohydrate conjugates | C31H52O8   | [M + Na] <sup>+</sup>      | 575.356  | 575.358  | 3.573   | 22.4507 | 0.68 | Root                 |
| Tris(diethylaminomethyl)phosphine oxide                                                                                                                           | Lipids and lipid-like molecules | Fatty Acyls                      | Unassigned                                | C15H36N3OP | [M + Na] <sup>+</sup>      | 328.2494 | 328.2481 | -3.9507 | 25.3301 | 0.68 | Stem Fruit Leaf Root |
| [(2S)-1-decanoyloxy-3-[(2R,3R,4S,5R,6R)-3,4,5-trihydroxy-6-(hydroxymethyl)oxan-2-yl]oxypropan-2-yl] hexadecanoate                                                 | Lipids and lipid-like molecules | Glycerolipids                    | Diacylglycerols                           | C35H66O10  | [M + Na] <sup>+</sup>      | 669.4554 | 669.4501 | -7.8589 | 33.8738 | 0.67 | Leaf                 |
| 2-[(1S,4S,5S)-4-[(benzylcarbamoylamino)methyl]-2-methyl-5-propan-2-ylcyclohex-2-en-1-yl]-N-(2-morpholin-4-ylethyl)acetamide                                       | Organic acids and derivatives   | Carboxylic acids and derivatives | Amino acids, peptides, and analogues      | C27H42N4O3 | [M + K] <sup>+</sup>       | 509.2894 | 509.2923 | 5.7169  | 17.3838 | 0.67 | Leaf Root            |

|                                                                                                                                                                      |                                 |                                     |                                           |             |                            |          |          |         |         |      |                         |
|----------------------------------------------------------------------------------------------------------------------------------------------------------------------|---------------------------------|-------------------------------------|-------------------------------------------|-------------|----------------------------|----------|----------|---------|---------|------|-------------------------|
| 1-(4-fluorophenyl)-4-{methyl[2-(1,3,4,9-tetrahydro-2H-beta-carbolin-2-yl)ethyl]amino}butan-1-one                                                                     | Benzenoids                      | Benzene and substituted derivatives | Halobenzenes                              | C24H28FN3O  | [M + H] <sup>+</sup>       | 394.2288 | 394.2281 | -1.7815 | 24.758  | 0.67 | Leaf Root               |
| Roseolide A                                                                                                                                                          | Lipids and lipid-like molecules | Prenol lipids                       | Unassigned                                | C42H60O10   | [M + Na] <sup>+</sup>      | 747.4084 | 747.408  | -0.597  | 25.1514 | 0.67 | Stem Fruit<br>Leaf Root |
| 6-[[3-(dimethylamino)-2-hydroxy-5-methylcyclohexyl]oxy]-16-ethyl-4-hydroxy-15-(hydroxymethyl)-5,7,9,13-tetramethyl-1-oxacyclohexadec-11-ene-2,10-dione               | Lipids and lipid-like molecules | Steroids and steroid derivatives    | Steroidal glycosides                      | C31H55NO7   | [M + Na] <sup>+</sup>      | 576.3876 | 576.3871 | -0.9499 | 14.3995 | 0.67 | Fruit Root              |
| 3,3'-Methylenebis(4-hydroxy-6-methyl-2H-pyran-2-one)                                                                                                                 | Organoheterocyclic compounds    | Pyrans                              | Pyranones and derivatives                 | C13H12O6    | [M + Na] <sup>+</sup>      | 287.0532 | 287.055  | 6.3733  | 13.663  | 0.67 | Stem Leaf               |
| 1-palmitoyl-3-alpha-D-galactosyl-sn-glycerol                                                                                                                         | Organic oxygen compounds        | Organooxygen compounds              | Carbohydrates and carbohydrate conjugates | C25H48O9    | [M + Na] <sup>+</sup>      | 515.3196 | 515.3216 | 3.7906  | 26.2643 | 0.67 | Stem Leaf<br>Root       |
| Burixafor                                                                                                                                                            | Organoheterocyclic compounds    | Azoles                              | Unassigned                                | C27H51N8O3P | [M + Na] <sup>+</sup>      | 589.3719 | 589.3729 | 1.6553  | 23.0873 | 0.67 | Root                    |
| 2-[(Carboxymethyl)thio]-5-nitrobenzoic acid                                                                                                                          | Benzenoids                      | Benzene and substituted derivatives | Benzoic acids and derivatives             | C9H7NO6S    | [M + H3N + H] <sup>+</sup> | 275.0338 | 275.0332 | -2.0083 | 20.8442 | 0.66 | Stem Leaf<br>Root       |
| methyl 2-[[2-[(17-hydroxy-10,13,17-trimethyl-7,8,9,11,12,14,15,16-octahydro-6H-cyclopenta[a]phenanthren-3-ylidene)amino]oxyacetyl]amino]-3-(1H-indol-3-yl)propanoate | Organic acids and derivatives   | Carboxylic acids and derivatives    | Amino acids, peptides, and analogues      | C34H43N3O5  | [M + H3N + H] <sup>+</sup> | 591.3546 | 591.3494 | -8.9292 | 19.4784 | 0.66 | Fruit Leaf<br>Root      |
| methyl 1-[3-[(2S,5aS,8aR)-1-methyl-6-[(1-methylindol-3-yl)methyl]-5-oxo-3,4,5a,7,8,8a-hexahydro-2H-pyrrolo[3,2-e][1,4]diazepin-2-                                    | Lipids and lipid-like molecules | Steroids and steroid derivatives    | Unassigned                                | C28H39N5O4  | [M + Na] <sup>+</sup>      | 532.29   | 532.2877 | -4.2077 | 16.6766 | 0.66 | Leaf Root               |

|                                                                                                                                                                                                 |                               |                                  |                                      |                   |                            |          |          |         |         |      |            |
|-------------------------------------------------------------------------------------------------------------------------------------------------------------------------------------------------|-------------------------------|----------------------------------|--------------------------------------|-------------------|----------------------------|----------|----------|---------|---------|------|------------|
| yl]propanoyl]piperidine-4-carboxylate                                                                                                                                                           |                               |                                  |                                      |                   |                            |          |          |         |         |      |            |
| Ala-Thr-Leu-Leu-Asp-Ala-al                                                                                                                                                                      | Organic acids and derivatives | Carboxylic acids and derivatives | Amino acids, peptides, and analogues | C26H46N6O9        | [M + H] <sup>+</sup>       | 587.3398 | 587.3425 | 4.4682  | 15.099  | 0.66 | Fruit Root |
| 1-[(3R,9R,10S)-9-[(dimethylamino)methyl]-12-[(2S)-1-hydroxypropan-2-yl]-3,10-dimethyl-13-oxo-2,8-dioxo-12-azabicyclo[12.4.0]octadeca-1(14),15,17-trien-16-yl]-3-(3,5-dimethyl-4-isoxazolyl)urea | Organic acids and derivatives | Carboxylic acids and derivatives | Amino acids, peptides, and analogues | C29H45N5O6        | [M + H3N + H] <sup>+</sup> | 577.3714 | 577.3677 | -6.3191 | 17.3565 | 0.66 | Root       |
| N''-(2-{3-[(cyclohexyloxy)methyl]-4-[3-(cyclopentyloxy)-2-hydroxy-5-(3-oxooct-4-en-1-yl)phenyl]-6-methyl-2,3,4,4a,5,6,7,8-octahydronaphthalen-2-yl}ethyl)guanidine                              | Organic acids and derivatives | Carboxylic acids and derivatives | Amino acids, peptides, and analogues | C40H61N3O4        | [M + K] <sup>+</sup>       | 686.4299 | 686.4274 | -3.6294 | 14.6137 | 0.65 | Root       |
| S-(3Alpha,7Alpha,12Alpha-Trihydroxy-5Beta-Cholestan-26-Oyl)-4'-Phosphopantetheine                                                                                                               | Organic acids and derivatives | Carboxylic acids and derivatives | Amino acids, peptides, and analogues | C38H67N2O11P<br>S | [M + H] <sup>+</sup>       | 791.4275 | 791.4224 | -6.4754 | 21.3521 | 0.65 | Leaf Root  |
